# Supplementary material for: A large-scale view of marine heatwaves revealed by archetype analysis
Source: PubMed Central journal article supplement (PMC9772210; doi:10.1038/s41467-022-35493-x), 2022-12-21
Supplement: 41467_2022_35493_MOESM1_ESM.pdf [file 41467_2022_35493_MOESM1_ESM.pdf]

33 ‘strong’ event in June 2017 (Supplementary Figs. 1b) and a ‘moderate’ event  
34 in June 2018 (Supplementary Figs. 1d), together with the two best-matching  
35 archetypes (Supplementary Figs. 1c,e), both of which show a broad similarity  
36 the daily snapshots and the composite average.

37  
38 The SST anomaly at the representative location, shown in Supplementary  
39 Fig. 1f, shows clear low-frequency variability, with periods of below average  
40 SST persisting for months or years at a time. Examples of these periods are  
41 1986-1988, 1990-1992, 1997, 2003-2004 and 2017-2019. Unsurprisingly, these  
42 periods correspond to periods relatively frequent marine coldspells. The affilia-  
43 tion time-series of the two best matching archetypes, showing in Supplementary  
44 Fig. 1g, appears to capture this low frequency variability, particularly archetype  
45 #1 (archetype # 2 appears to correspond more commonly to isolated marine  
46 coldspell periods). For example, the multi-year marine cold-spell described by  
47 Feng et al. 2021[2], that occurred over the period 2016 to 2020, can be seen to  
48 correspond to a period where the affiliation of both best-matching archetypes  
49 is consistently higher than 0.4.

50  
51 Zooming out to investigate the teleconnection patterns, shown in Supplemen-  
52 tary Fig. 2. We note that, in contrast to the marine heatwave case-study pre-  
53 sented in the main text, there is no strong SST signature in the tropical Pacific.  
54 In fact, the affiliation time-series is positively correlated with the multivariate  
55 ENSO index at a peak lag of +10 months (Supplementary Figs. 2d,e), sugges-  
56 tive that widespread cold temperatures in the southeast Indian ocean occur 8-12  
57 months prior to the onset of El-Niño. The anomalous atmospheric circulation,  
58 shown in Supplementary Fig. 2b, indicates widespread anomalously equator-  
59 ward winds over the region of interest, and likely contributes to the cooler than  
60 average temperatures. However, correlation with the Southern Annular Mode  
61 (SAM) index is weak and the spatial patterns of mid-tropospheric geopotential  
62 height anomalies are not strongly reminiscent of the canonical SAM.

## 64 **Tasman Sea and East Australian Current Marine Heat-** 65 **waves**

66 In the main text, we have employed case-studies to demonstrate the utility of  
67 archetypal analysis in identifying large-scale ‘extreme’ modes of variability that  
68 can influence local environmental conditions sufficiently to induce (or at least  
69 contribute) to the occurrence of marine temperature extremes. However, the  
70 conditions at any particular location are obviously influenced by both broad-  
71 scale (or remote) and local factors. In the following case-study, we illustrate  
72 two cases where local dynamics, not broad scale dynamics, are the dominant  
73 influence.

74 We take the well studied 2016 Tasman Sea marine heatwave as our first ex-  
75 ample. This event occurred in the southern Tasman Sea, centered to the east  
76 of Tasmania, starting in early September 2015 and lasting for approximately

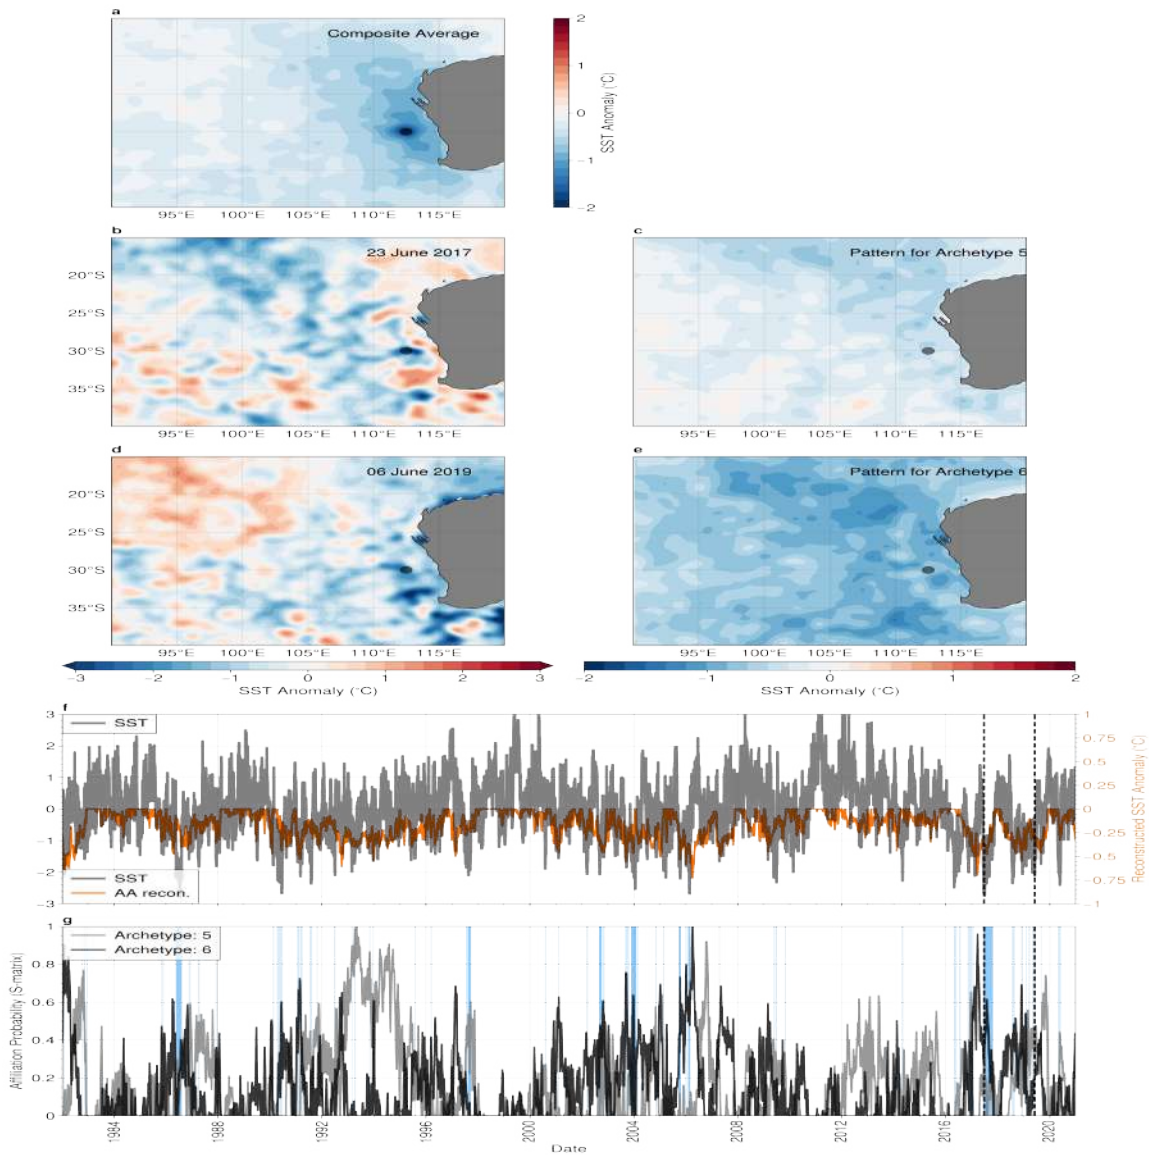

Supplementary Figure 1: **The relationship between Marine Coldspells and Archetypes #5 and #6 in the southeast Indian ocean** : **a** Sea-surface temperature (SST) anomaly composite average of all marine coldspells at a representative location (at 30°S,112.5°E, shown as a grey dot) in the southeast Indian Ocean; **b,d** snapshot of SST anomalies for the peak for the peak day of the strong marine coldspell event on the 23rd of June, 2017, and the moderate event on the 6th of June 2018; **c,e** the SST anomalies for best matching archetypal pattern (archetype #5 archetype #6); **f** time-series of SST anomalies (black) and the reconstruction from archetype 3 (orange) at the representative location shown in panels **a–c** ; **e** time-series of archetype affiliation probability for archetype 3. Colored bands in panels **d,e** indicate marine coldspell occurrences, coded by the severity category described in *Hobday et al. 2018*[3].

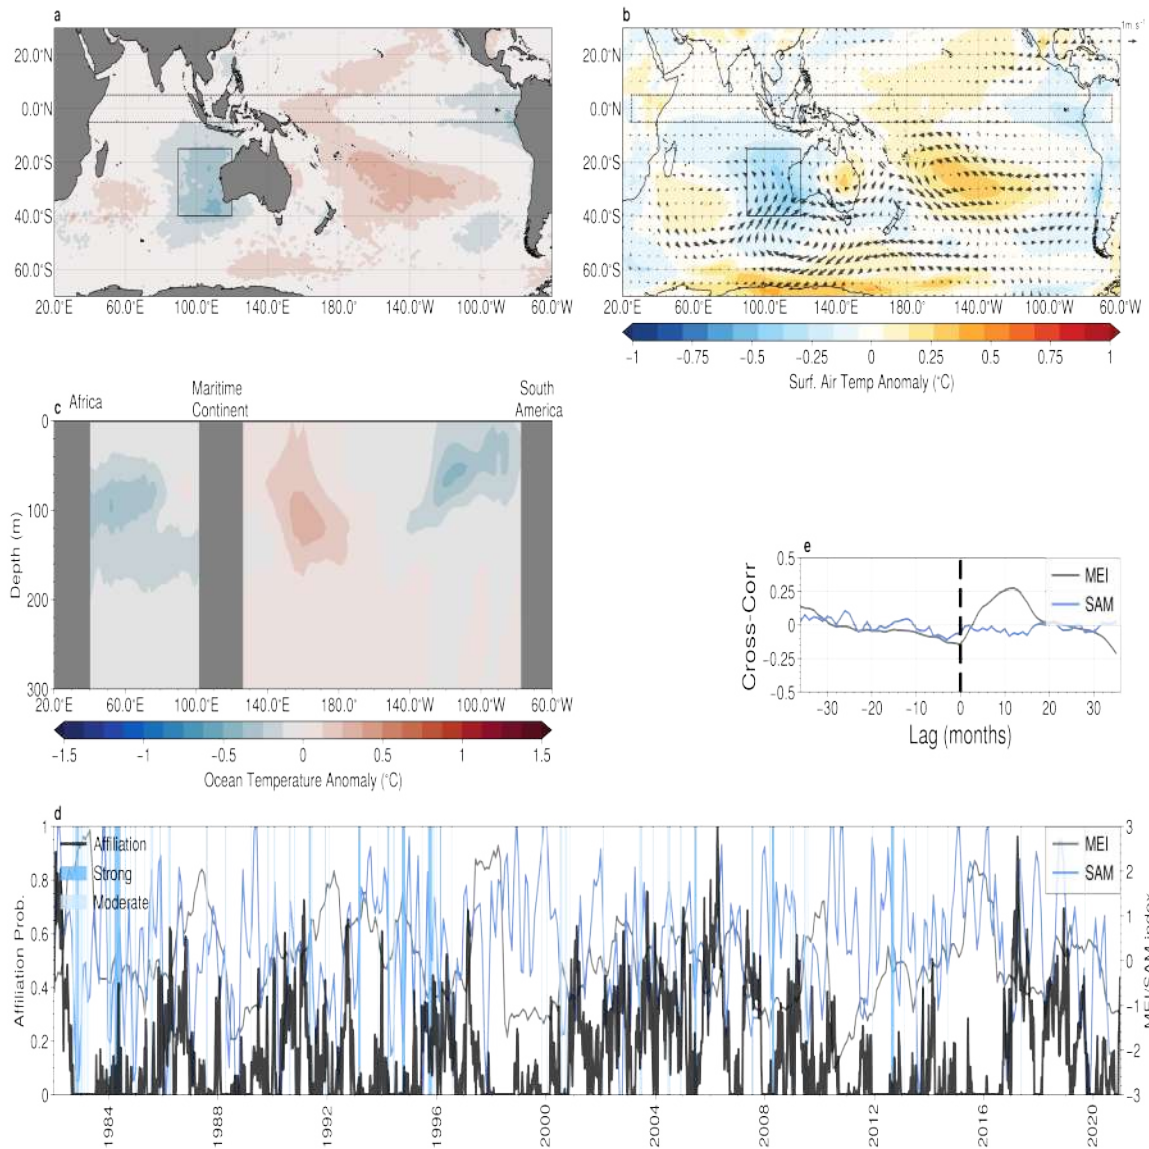

Supplementary Figure 2: **Teleconnections Associated with Marine Cold-spells in the Southeastern Indian Ocean:** **a** Sea-surface temperature (SST) anomaly; **b** surface air temperature (colours) with anomalous mid-tropospheric (500hPa) geopotential height (contour lines) and winds (vectors); and **c** equatorial subsurface temperatures, associated with archetype #3, the best-matching archetype for marine heatwaves in the southeast Indian Ocean. **d** The affiliation time-series (solid black) together with the multivariate El-Niño index (MEI, grey) and the Marshall Southern Annular Mode (SAM) index (blue). Periods of marine heatwaves are indicated by red shading. **e** the lagged cross-correlation between the affiliation time-series and the MEI (gray) and the Marshall SAM index (blue). Negative lags correspond to the MEI/SAM index leading the affiliation.

77 251 days to finish in May 2016[4]. Supplementary Fig. 3a shows the peak day  
78 of this event (8th February 2016) at a representative location (42.75°S,148.5°E,  
79 shown as a grey circle in Figs 3) along with the composite average of all events  
80 at that location (Supplementary Fig. 3b). Both the peak day snapshot and  
81 the composite average have similar spatial structures, which suggests that most  
82 marine heatwaves in the region have a similar spatial structure.

83  
84 In contrast, the spatial structure of the best matching archetype (Sup-  
85 plementary Fig. 3c) does not show the same spatial structure as either the  
86 daily snapshot or the composite average of marine heatwaves near Tasmania.  
87 While the time-series of the SST anomaly (Supplementary Fig. 3d) and the  
88 affiliation time-series of the best-matching archetype show correlation in later  
89 part of the time-period (from 2008 onward) with a particularly notable co-  
90 occurrence of SSTs and an affiliation probability near 1 during the 2015-2016  
91 marine heat wave event. However, the spatial patterns associated with the best-  
92 matching archetype show little similarity to those associated with southern Tas-  
93 man sea marine heatwaves. Instead of localised warm SSTs around Tasmania,  
94 the archetype shows a broad region of elevated SSTs in the Tasman and Coral  
95 Seas, extending from the east coast of the Australian continent to around 180°  
96 longitude. Prior to 2008, periods with high affiliation probabilities are not con-  
97 sistent with marine heatwaves at the representative location. For  
98 example, the affiliation probability reaches 1 in 1998, a time period associated  
99 with *lower* than average SSTs.

100 In a similar vein, we plot the same marine heatwave metric for events in the  
101 East Australian Current (EAC) (Supplementary Fig. 4), at 30°S, near the city  
102 of Coffs Harbour. Marine heatwaves in this region have been attributed to a  
103 combination of local oceanographic factors, such as eddy interaction with the  
104 EAC, and atmospheric effects[5]. In this case, the spatial structure of SSTs for  
105 the peak of the most intense event (4th February 2017, Supplementary Fig. 4a),  
106 the composite average of all events at this location (Supplementary Fig. 4b) and  
107 the best-match archetype (Fig. 4c, as in the southern Tasman Sea case study  
108 above) are similar, with a broad pattern of high SST anomalies over the Tasman  
109 Sea region, from the eastern Australian coastline to a longitude of ~180°, al-  
110 though we note that the strongest SSTs are found along the Australian coastline  
111 in both the single day snapshot and the composite average of all events, which  
112 is not apparent in the SST pattern associated with the archetype. However, in-  
113 vestigating the time-series (Supplementary Fig. 4d,e) shows limited correlation  
114 between the affiliation time-series and the SST time-series at the representative  
115 location, with the exception of the period around 1998 and, to a much lesser  
116 extent, around 2010, which showed both an elevated affiliation probabilities and  
117 anomalously high SSTs. Marine heatwave periods tend to cluster in the later  
118 half of the time-series, consistent with the enhanced SSTs in the region as a  
119 result of continued global warming[6].

120 The teleconnections associated with best-matching archetype are shown in  
121 Supplementary Fig. 5. The SST pattern in the equatorial Pacific, together  
122 with the peaks in the affiliation time-series in the years 1998 and 2016, strongly

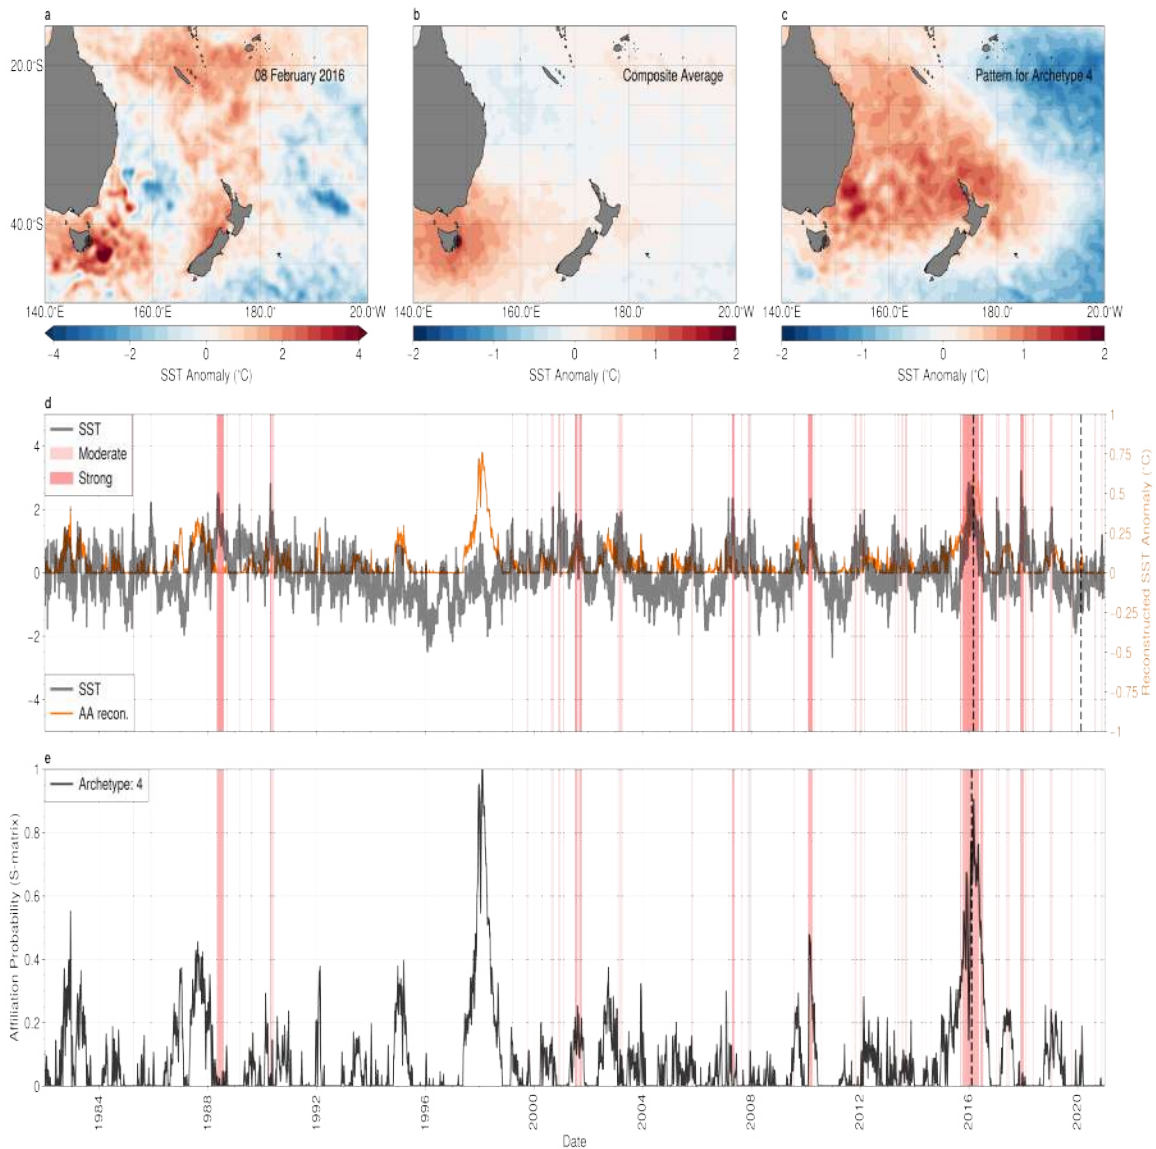

Supplementary Figure 3: **The relationship between Marine Heatwaves and Archetype #4 in the Tasman Sea:** **a** snapshot of sea-surface temperatures (SST) anomalies for the peak of the 2016 strong marine heatwave event, which occurred on the 8th of February, 2016; and **b** SST composite average for all marine heatwave detected at a representative location. Statistics are calculated at the representative location  $45.9^{\circ}\text{S}, 171^{\circ}\text{E}$ , indicated by the grey circle. **c** the SST anomalies for best matching archetypal pattern (archetype 4); **d** time-series of SST anomalies (black) and the reconstruction from archetype 3 (orange) at the representative location shown in panels **a-c**; **e** time-series of archetype affiliation probability for archetype 3. Colored bands in panels **d,e** indicate marine coldspell occurrences, coded by the severity category described in *Hobday et al. 2018*[3].



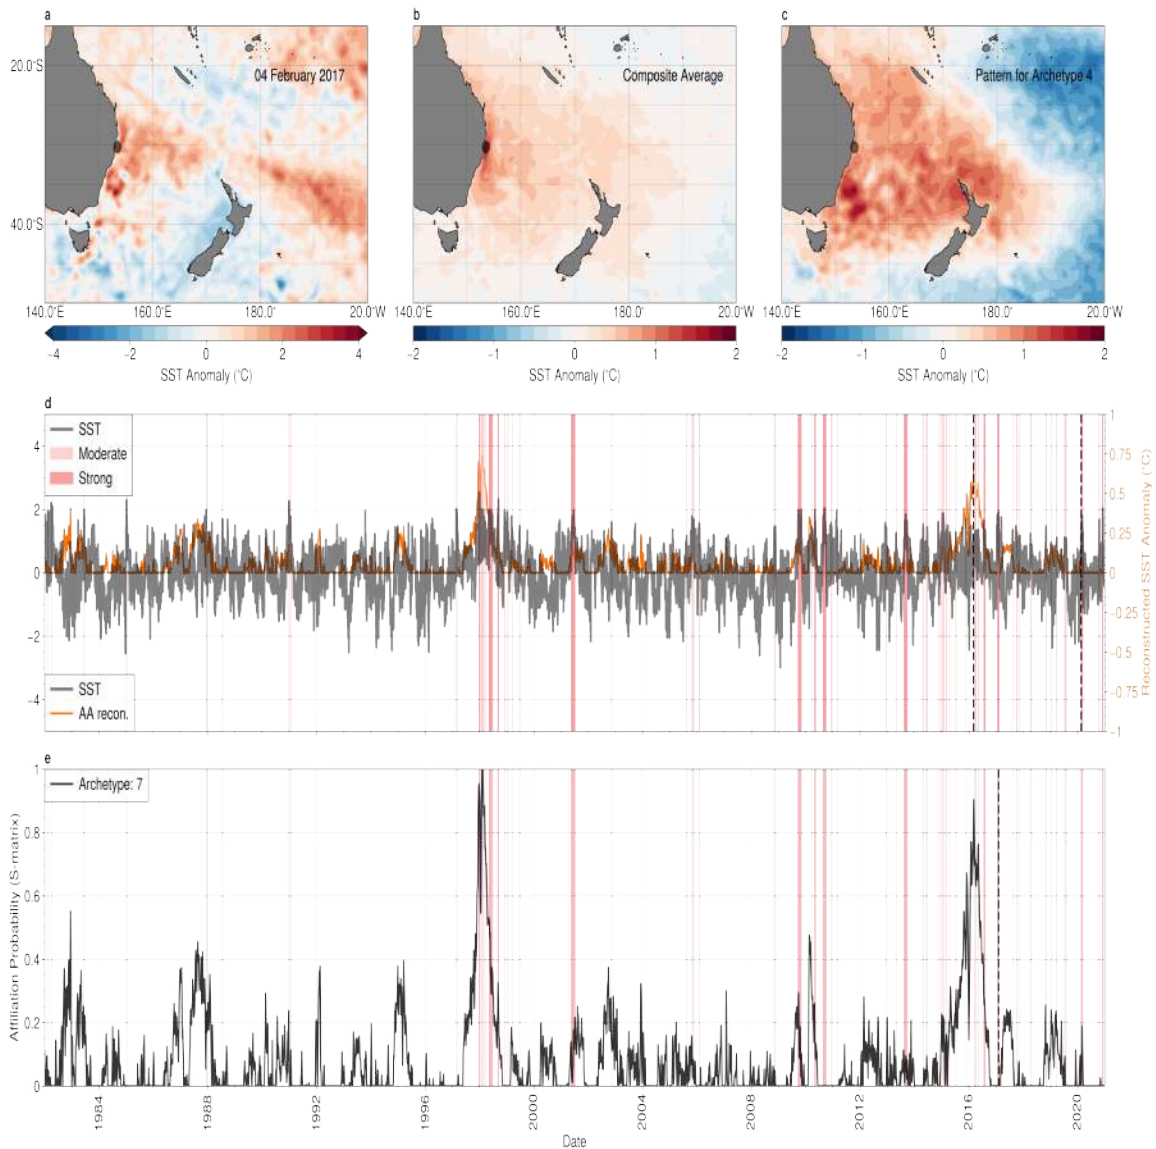

Supplementary Figure 4: **The relationship between Marine Heatwaves and Archetype #7 in the East Australian Current:** **a** snapshot of sea-surface temperature (SST) anomalies for the peak of the 2017-2018 severe marine heatwave event, which occurred on the 5th of December, 2017; and **b** SST composite average for all marine heatwaves detected at a representative location. Statistics are calculated at the representative location 30°S,152°E, indicated by the grey circle. **c** the SST anomalies for best matching archetypal pattern (archetype 4); **d** time-series of SST anomalies (black) and the reconstruction from archetype 3 (orange) at the representative location shown in panels **a-c** ; **e** time-series of archetype affiliation probability for archetype 3. Colored bands in panels **d,e** indicate marine heatwaves occurrences, coded by the severity category described in *Hobday et al. 2018*[3]

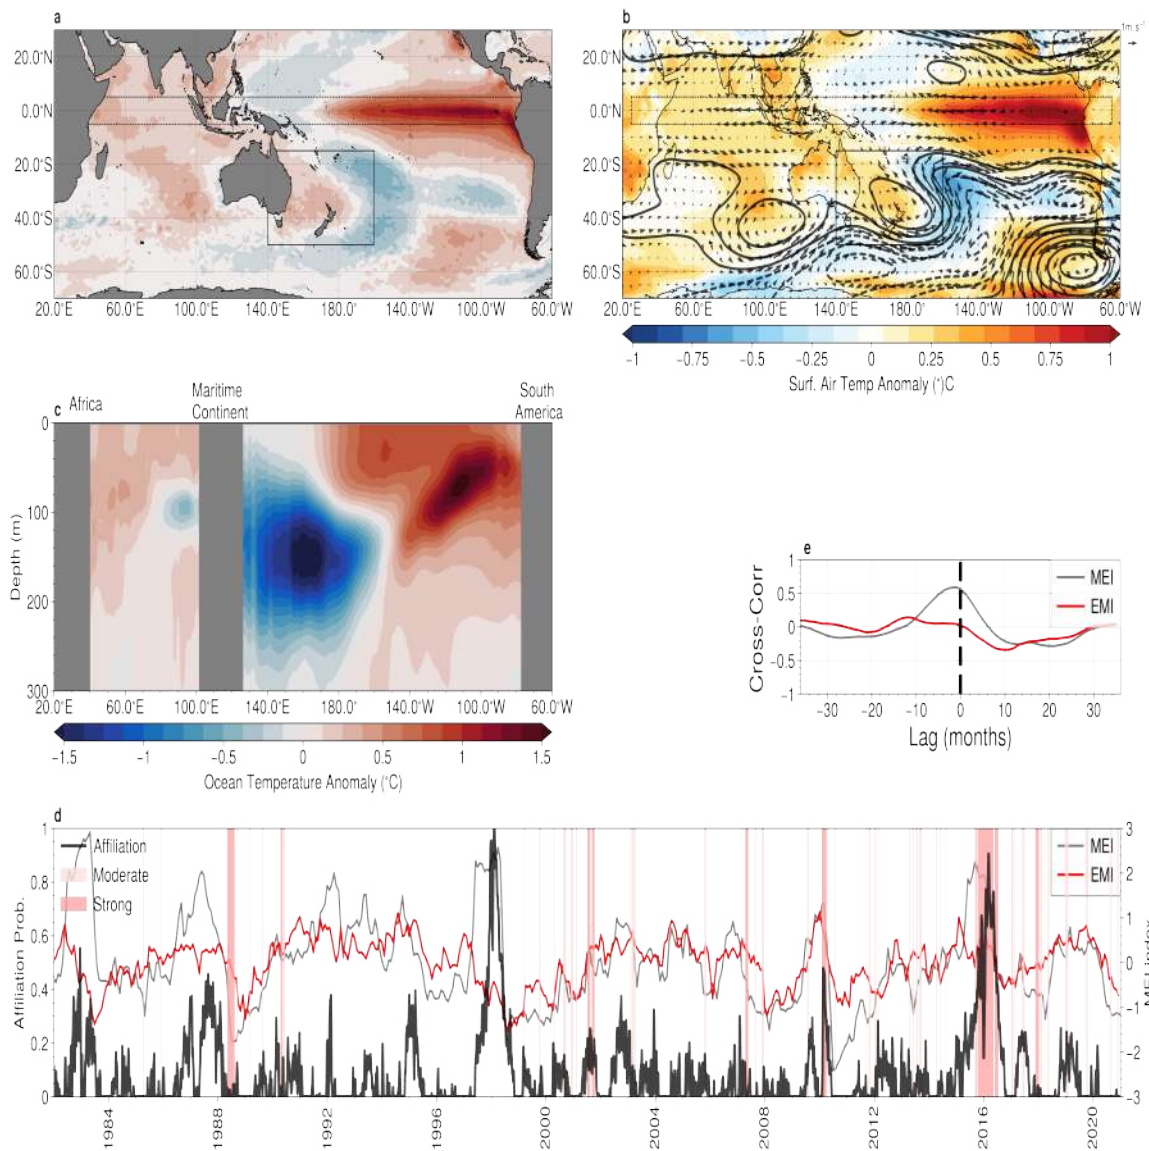

Supplementary Figure 5: **Teleconnections Associated with Tasman Sea Marine Heatwaves:** **a** Sea-surface temperature (SST) anomaly; **b** surface temperature (colours) with anomalous mid-tropospheric (500hPa) geopotential height (contour lines) and winds (vectors); and **c** equatorial subsurface temperatures, associated with archetype #6, the best-matching archetype for marine heatwaves in the southeast Indian Ocean.

textbfd The affiliation time-series (solid black) together with the multivariate El-Niño index (MEI, grey) and the Marshall Southern Annular Mode (SAM) index (blue). Periods of marine heatwaves are indicated by red shading. **e** the lagged cross-correlation between the affiliation time-series and the MEI (gray) and the Marshall Southern Annular Mode (SAM) index (blue). Negative lags correspond to the MEI/SAM index leading the affiliation.



123 suggest that this archetype represents the variability associated with strong El-  
124 Niño events. Atmospheric circulation anomalies and sub-surface temperatures  
125 strongly support this inference, with the characteristic weaker than average  
126 trade winds evident in the atmospheric composites, and the warmer sub-surface  
127 ocean temperatures in the eastern Pacific and cooler than average temperatures  
128 in the western Pacific. However, the temperature expression is not particular  
129 strong in the Tasman Sea.

130 None of the 8 archetypes obtained by our analysis strongly projects into the  
131 Tasman Sea in the same way that other archetypes project into the south-east  
132 Indian ocean, and the archetype that projects the most strongly (Archetype  
133 #5) does not strongly reflect either the spatial or temporal structures of marine  
134 heatwaves in the region. Taken together, this leads us to conclude that in this  
135 complex western boundary current region, marine extremes are likely driven by  
136 local process not well captured by the large scale archetypes.

## 137 **Supplementary Methods**

### 138 **Archetypal Patterns**

139 In the main text, we show only 4 of a total of 8 archetypal patterns - a choice mo-  
140 tivated by a desire to avoid clutter of both text and graphics. For completeness,  
141 the remaining archetypes are shown in Supplementary Fig. 6. The archetypes  
142 not shown in the main text are #5, #6, #7 and #8. Archetypes #1 and #2  
143 (Supplementary Fig. 6a,b and Supplementary Fig. 6c,d ) are discussed in the  
144 marine coldspell case study included within the this supplementary material.  
145 Here, archetypes labelling is arbitrary. However, archetypes can be ranked by  
146 a number of methods. For example, the most probable archetype can be com-  
147 puted by the summation of the affiliation matrix across all time steps, or the  
148 archetype that expresses highest variance can be computed by reconstructing  
149 the original data matrix (Eqn. 1 in the main text) archetype by archetype.

150 As in the main text, we also show the temporal occurrence and persistence of  
151 all 8 archetypes in Supplementary Fig. 7. The archetypes not discussed in the  
152 main text show periods of persistence, such as archetype #6 during the period  
153 1993-1995, or archetype #8, which has the signature of moderate El-Niño and  
154 was strongly expressed in 1992 and 2007.

### 155 **Time Shifted Composites of Archetypal Fields**

156 As mentioned in the main text, the expression of a particular archetype may  
157 propagate temporally, and different regions may reach their maximum response  
158 to sometime before or after the a peak in the affiliation probability. Investigating  
159 the lagged response can provide insights into the temporal behaviour of the  
160 archetypal pattern.

161 Here, we plot the SST determined by calculating the weighted average of  
162 the SST and the affiliation time-series, shifted by -90, -60, -30, 0 and +15 days.

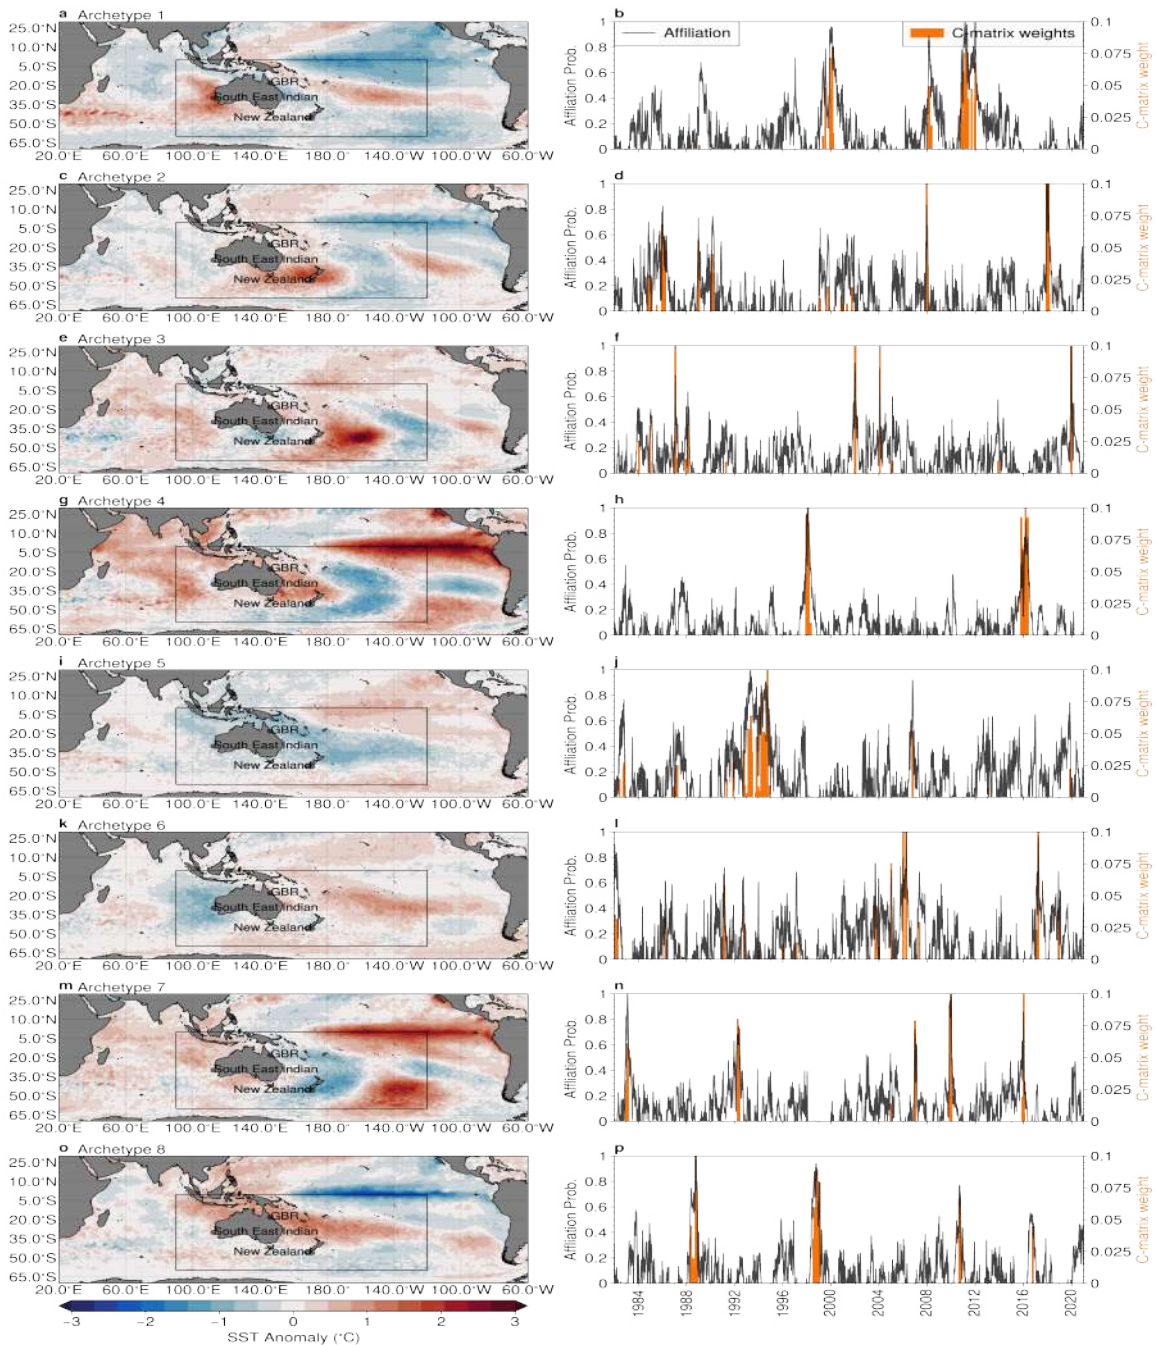

Supplementary Figure 6: **Archetypal Patterns and Affiliation time-series over the and South Pacific:** (left) Detrended sea-surface temperature (SST) anomalies for all eight archetypal patterns computed over the Australasian region (indicated by the black box), ranked from most likely to least likely to occur, and (right) associated affiliation time-series (black solid line) and the *C-matrix weights* applied to each time snapshot to form the archetypes (orange bars). The AA is conducted in the domain in the left-hand column. Archetypes #1 (panels a,b), #2 (panels c,d), #3 (panels e,f) and #4 (panels a,b) are used in the regional case studies in the main text (locations indicated in the text) while archetype #8 (panels i,j) is shown to illustrate classical El Niño type variability. Archetypes #5 (panels i,j), #6 (panels k,l), and #4 (panels g,h) are used in regional case studies in the supplementary material.

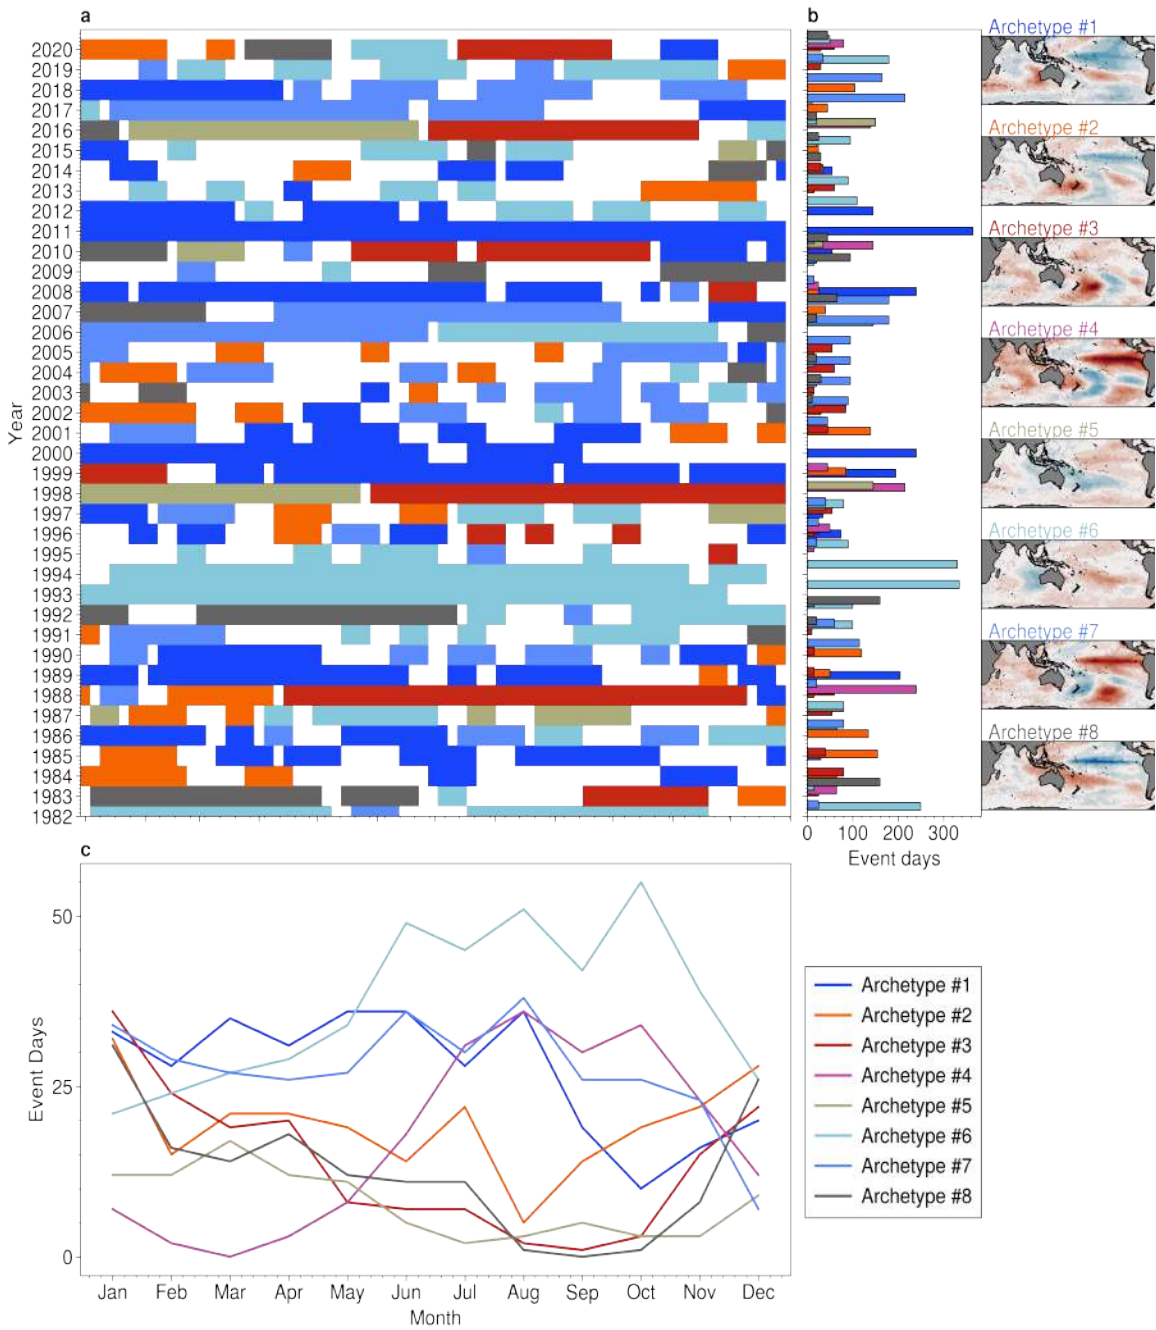

Supplementary Figure 7: **Temporal Occurrence of Archetype Patterns:** **a** Coloured blocks indicate period where a particular archetype was dominant for at least 20 days. The  $y$ -axis indicates the year, while the  $x$ -axis indicates the calendar days. Blanked periods show days where no qualifying event was found; the total number of archetype event days for each archetype that occur **b** for each year; and **c** for each 5-day period over the annual cycle. Maps to the right show spatial patterns of sea-surface temperature (SST) anomaly for each archetype.

163 We note strong persistence in certain archetypal patterns (for example, those  
164 associated with El-Niño or La-Niña like modes).

165 To better assess the temporal evolution of the extreme climate modes de-  
166 termined by archetype analysis, we plot the time-shifted composite SST for all  
167 archetypes at the representative location for each of the case-studies presented  
168 in the main text, in Supplementary Fig. 12. Together with the persistence  
169 plots shown in Supplementary Fig. 7, these results describe the time-scales of  
170 the evolution of each mode, as well as its phasing.

171  
172 For the first case-study in the Southeast Indian Ocean (Supplementary Fig.  
173 12a), it can be seen that the dominant (positive) influence on the SST in the  
174 region is archetype #1 (which corresponds to the *best-matching archetype* in the  
175 main text). It's influence is greatest at a lag of 0, and shows remarkable per-  
176 sistence, with a continued positive expression even 150 days prior to and after  
177 the peak of the event. In contrast, the New Zealand case-study (Supplementary  
178 Fig. 12b), shows that the best-matching archetype #2, has both a faster growth  
179 an decay rate, with an e-folding timescale of approximately 50 days. The differ-  
180 ing timescales is consistent with the different dynamical origins of the marine  
181 heatwaves events: the slow evolution of tropical La-Niña conditions and their  
182 propagation through the Indonesian archipelago over the course of months in  
183 the southeast Indian case study, the (relatively) fast evolution of atmospheric  
184 blocking in the later.

185  
186 In the final case study in the Great Barrier Reef region (Supplementary Fig.  
187 12c) we note that archetype #4, associated with strong classical El-Niño like  
188 events, has its strongest influence on the representative location approximately  
189 100 days *after* the strongest expression of the mode, centered in the equatorial  
190 Pacific. This suggests that the response of the GBR region to El-Niño occurs  
191 during the decay phase of the event. Archetype #3 shows only a weak response  
192 in the region leading the expression of the climate mode in the south Pacific by  
193 several days.



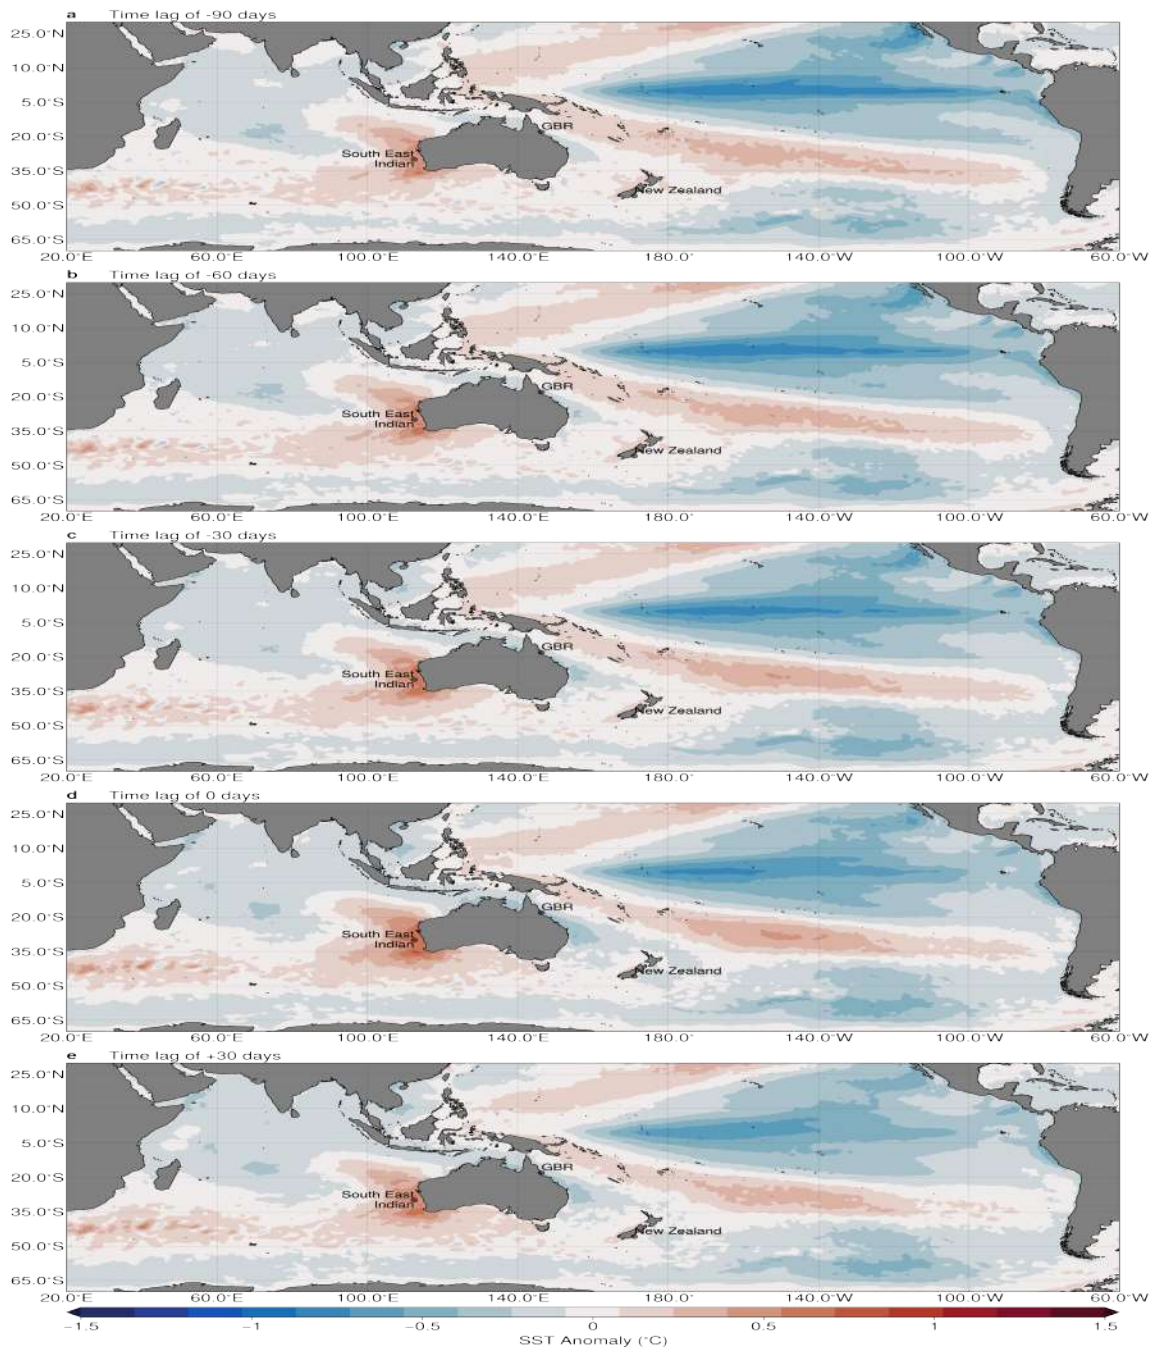

Supplementary Figure 8: Sea-surface temperature lagged *S*-matrix composites for archetype #1: a -90 days; b -30 days; c -30 days; d 0 days (identical to those plotted in the main text); and e +30 days.



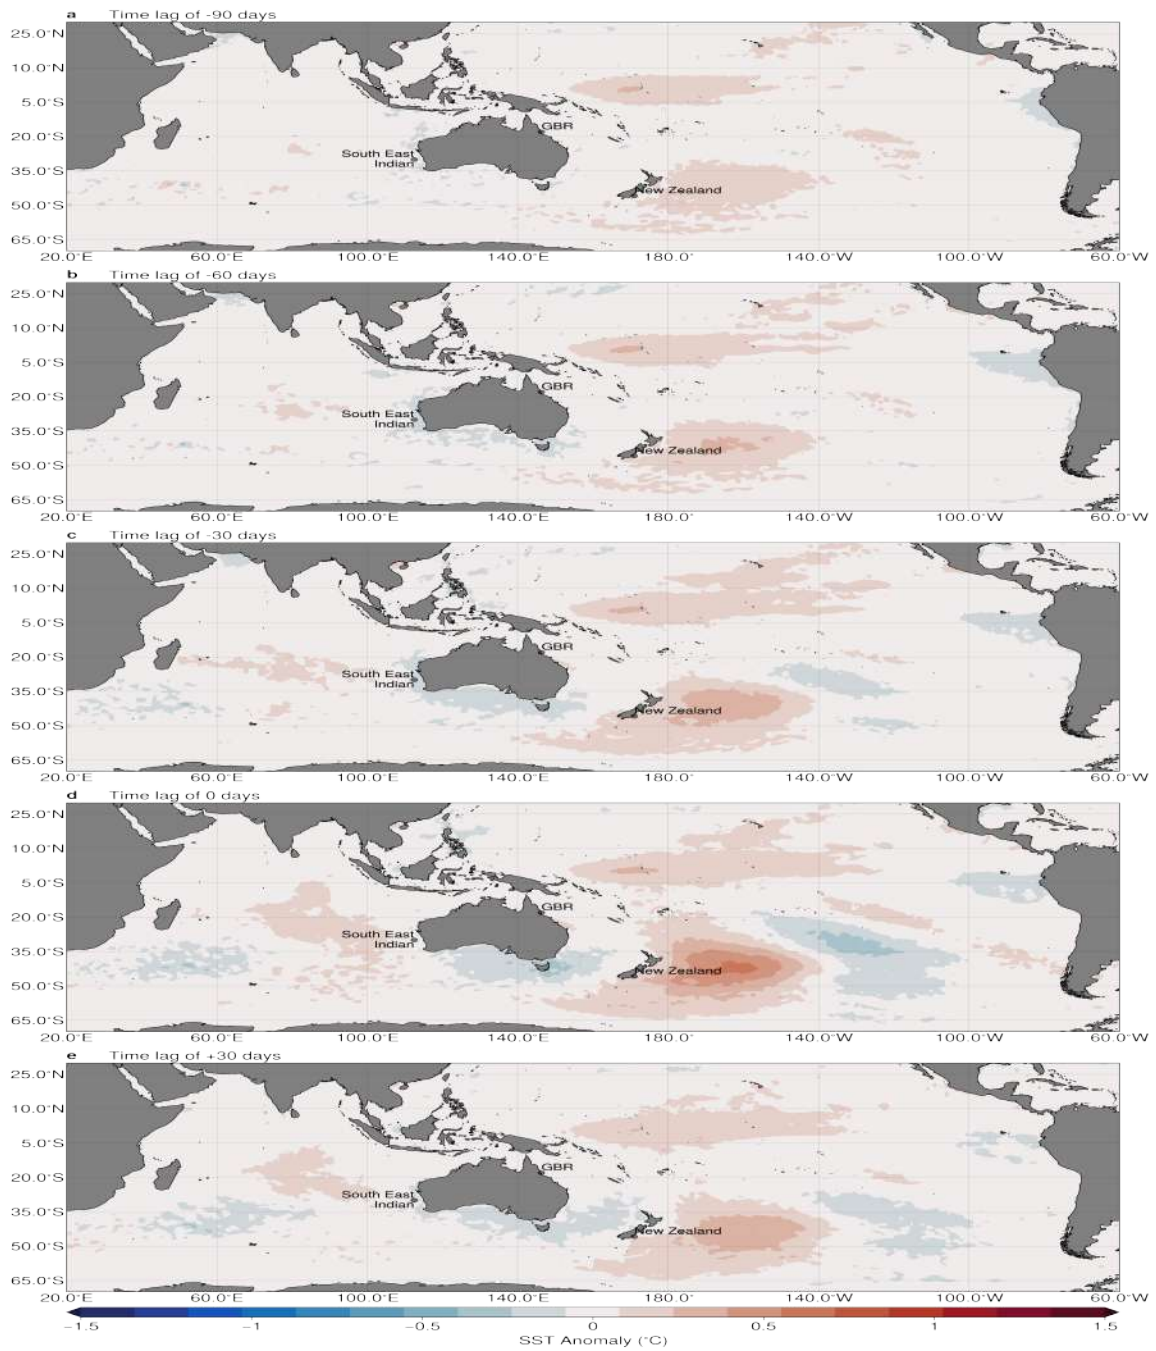

Supplementary Figure 9: Sea-surface temperature lagged *S*-matrix composites for archetype #3: a -90 days; b -30 days; c -30 days; d 0 days (identical to those plotted in the main text); and e +30 days.

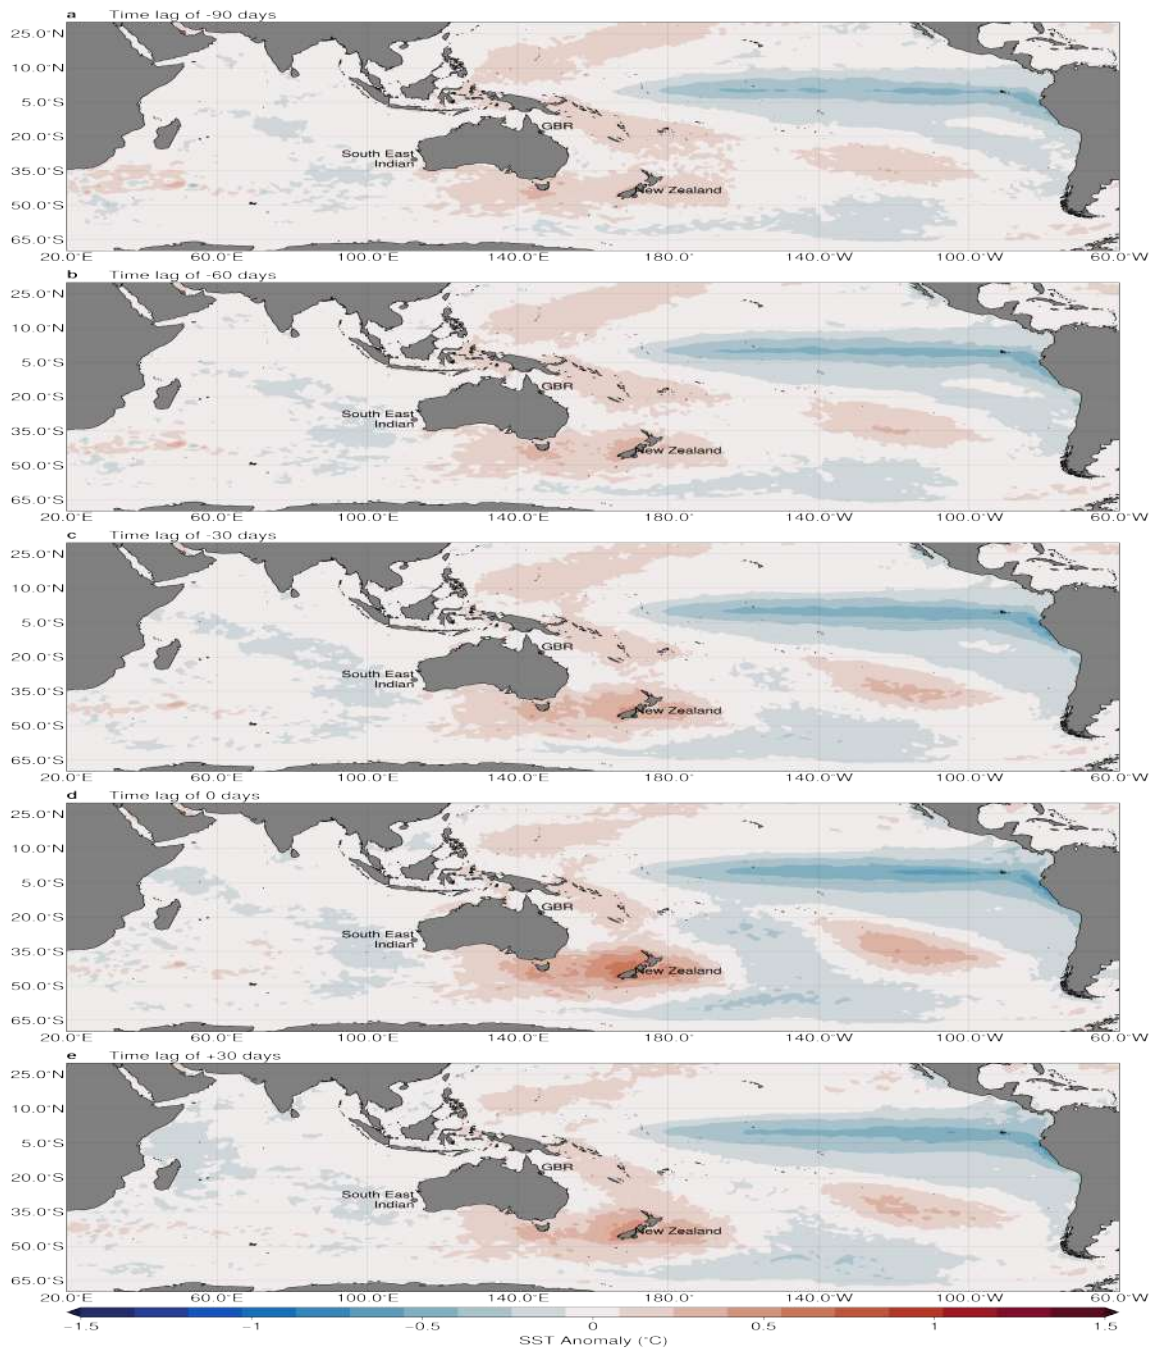

Supplementary Figure 10: **Sea-surface temperature lagged *S*-matrix composites for archetype #4: a -90 days; b -30 days; c -30 days; d 0 days (identical to those plotted in the main text); and e +30 days.**

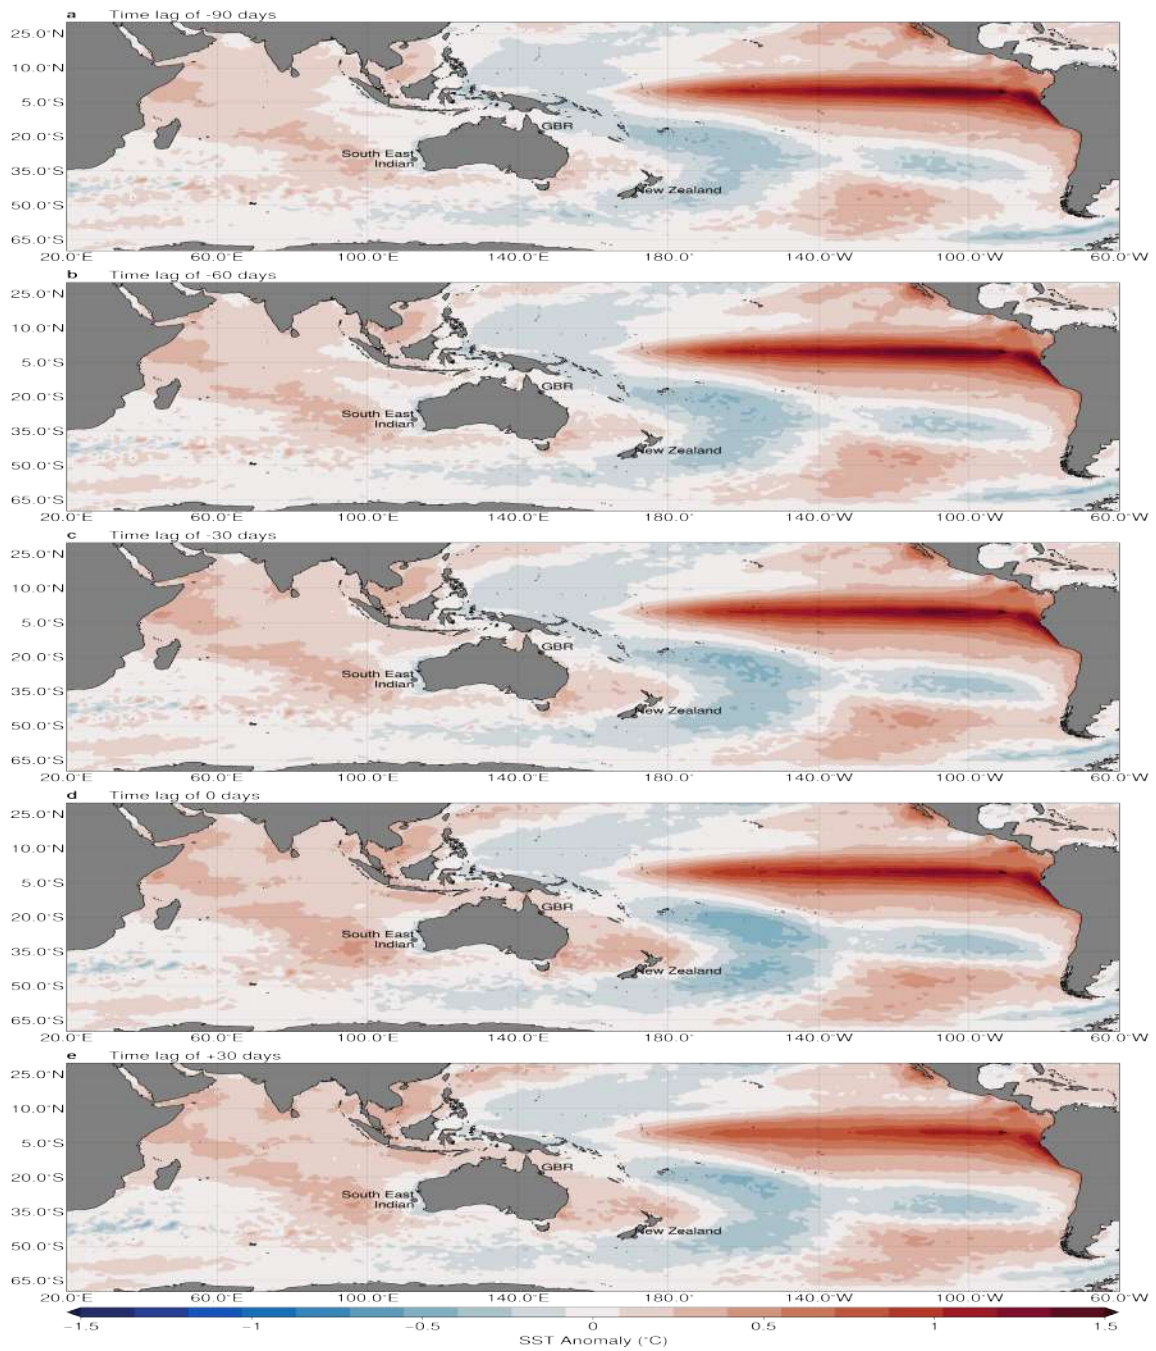

Supplementary Figure 11: Sea-surface temperature lagged  $S$ -matrix composites for archetype #4: a -90 days; b -30 days; c -30 days; d 0 days (identical to those plotted in the main text); and e +30 days.



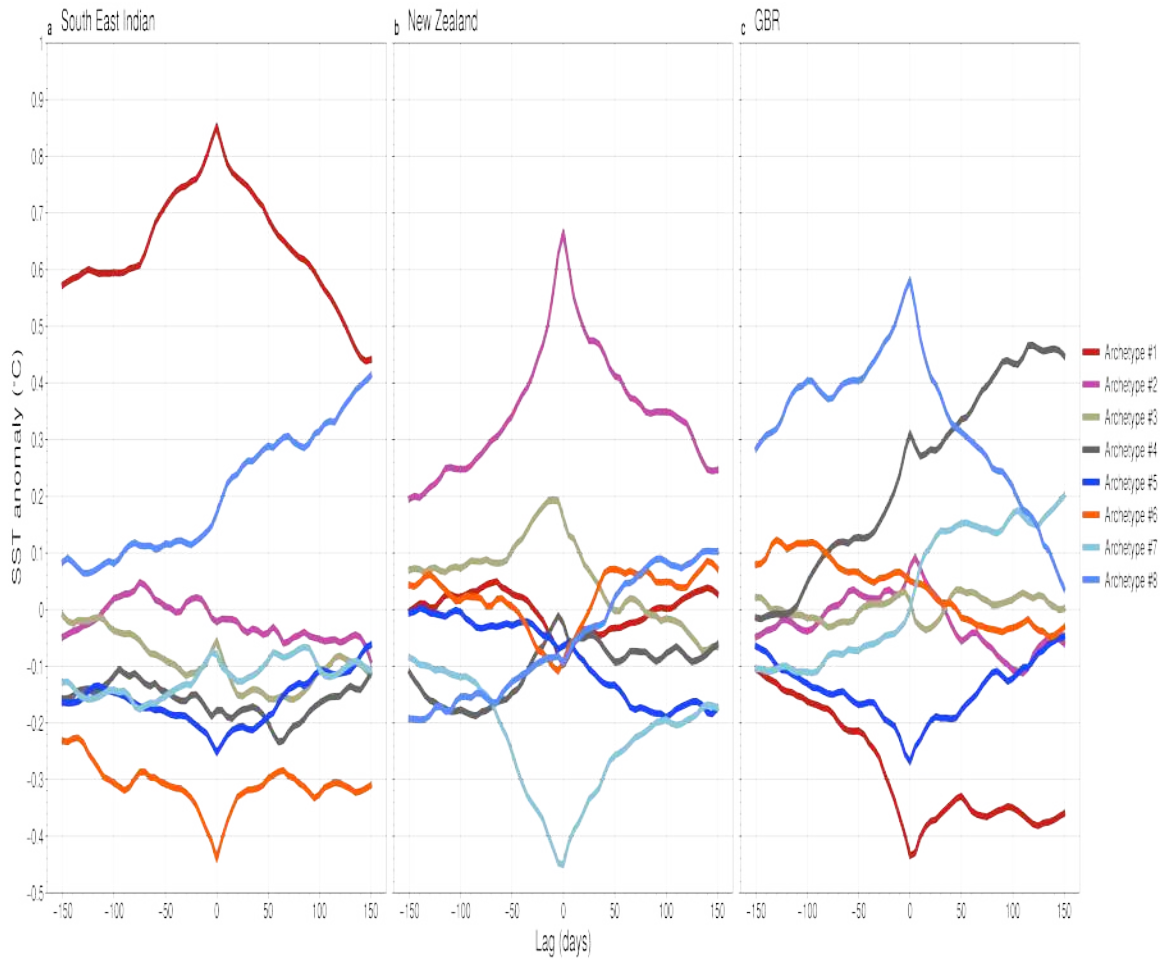

Supplementary Figure 12: **Lagged sea-surface temperature for each archetypal pattern at for each main text case study a South-east Indian Ocean; b South-west Pacific/New Zealand; c Great Barrier Reef region.**

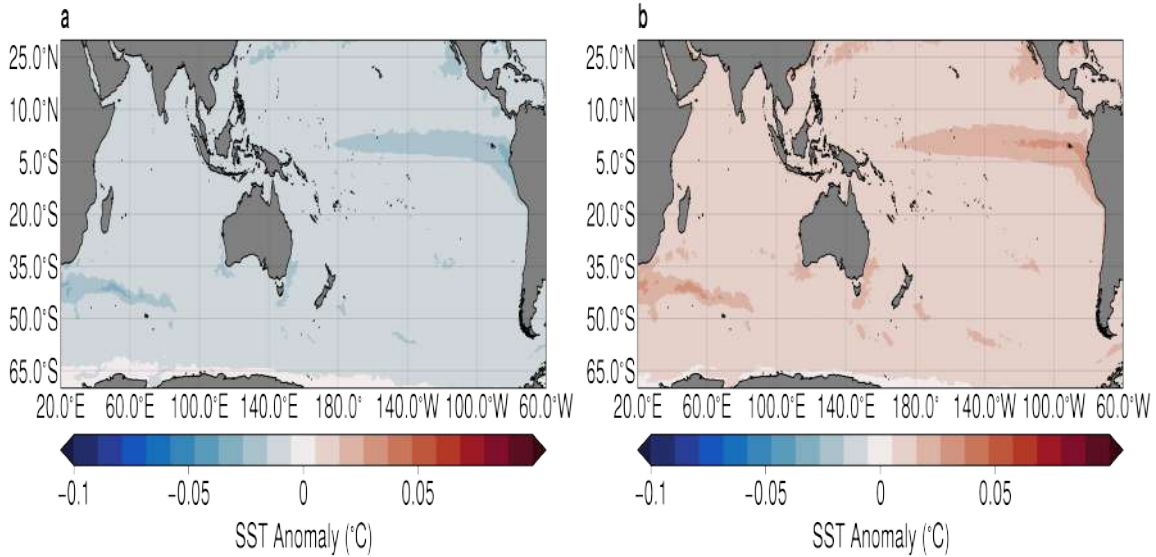

Supplementary Figure 13: **Quantiles of sea-surface temperature used for statistical significance testing: a 5th percentile; and b 95th percentile.**

194 **Statistical Significance of Archetypal Patterns**

195 In order to evaluate the statistical significance of archetypal spatial patterns  
 196 and the composite fields, we employ a brute-force Monte-Carlo approach. First,  
 197 we generate synthetic stochastic matrix, designed to replicate the features of  
 198 the  $C$  or  $S$  matrices. The elements of these matrices is drawn from a uniform  
 199 distribution between 0 and 1. The rows or columns of these synthetic stochastic  
 200 matrices are then normalised appropriately to ensure that the constraints. For  
 201 example, in the case of a synthetic  $C$ -matrix, the normalisation is applied to  
 202 rows to ensure that the constraint  $\sum_t^T c_{t,j} = 1$  is satisfied. In the case of a  
 203 synthetic  $S$ -matrix, the normalisation is performed column-wise, to satisfy the  
 204 constraint  $\sum_j^P s_{t,j} = 1$ . We then form composite fields on these synthetic ma-  
 205 trices. The procedure is repeated 1000 times and the 5th and 95th percentiles  
 206 computed (shown in Supplementary Fig. 13). A pixel is declared ‘significant’ if  
 207 it is less than the 5th percentile, or greater than the 95th percentile.

208  
 209 In Supplementary Fig. 14, we plot the SST archetypal patterns for all 8  
 210 archetypes, similarly to Supplementary Fig. 6. Stippling indicates statistical  
 211 significance. As can be seen in the figure, fields are almost everywhere statisti-  
 212 cally significant (with the exception of regions that separate warm and cold  
 213 anomalies). This result might be expected from the fact that AA identifies  
 214 extreme states.

215 In Supplementary Fig. 15, we show the statistical significance of the geopo-



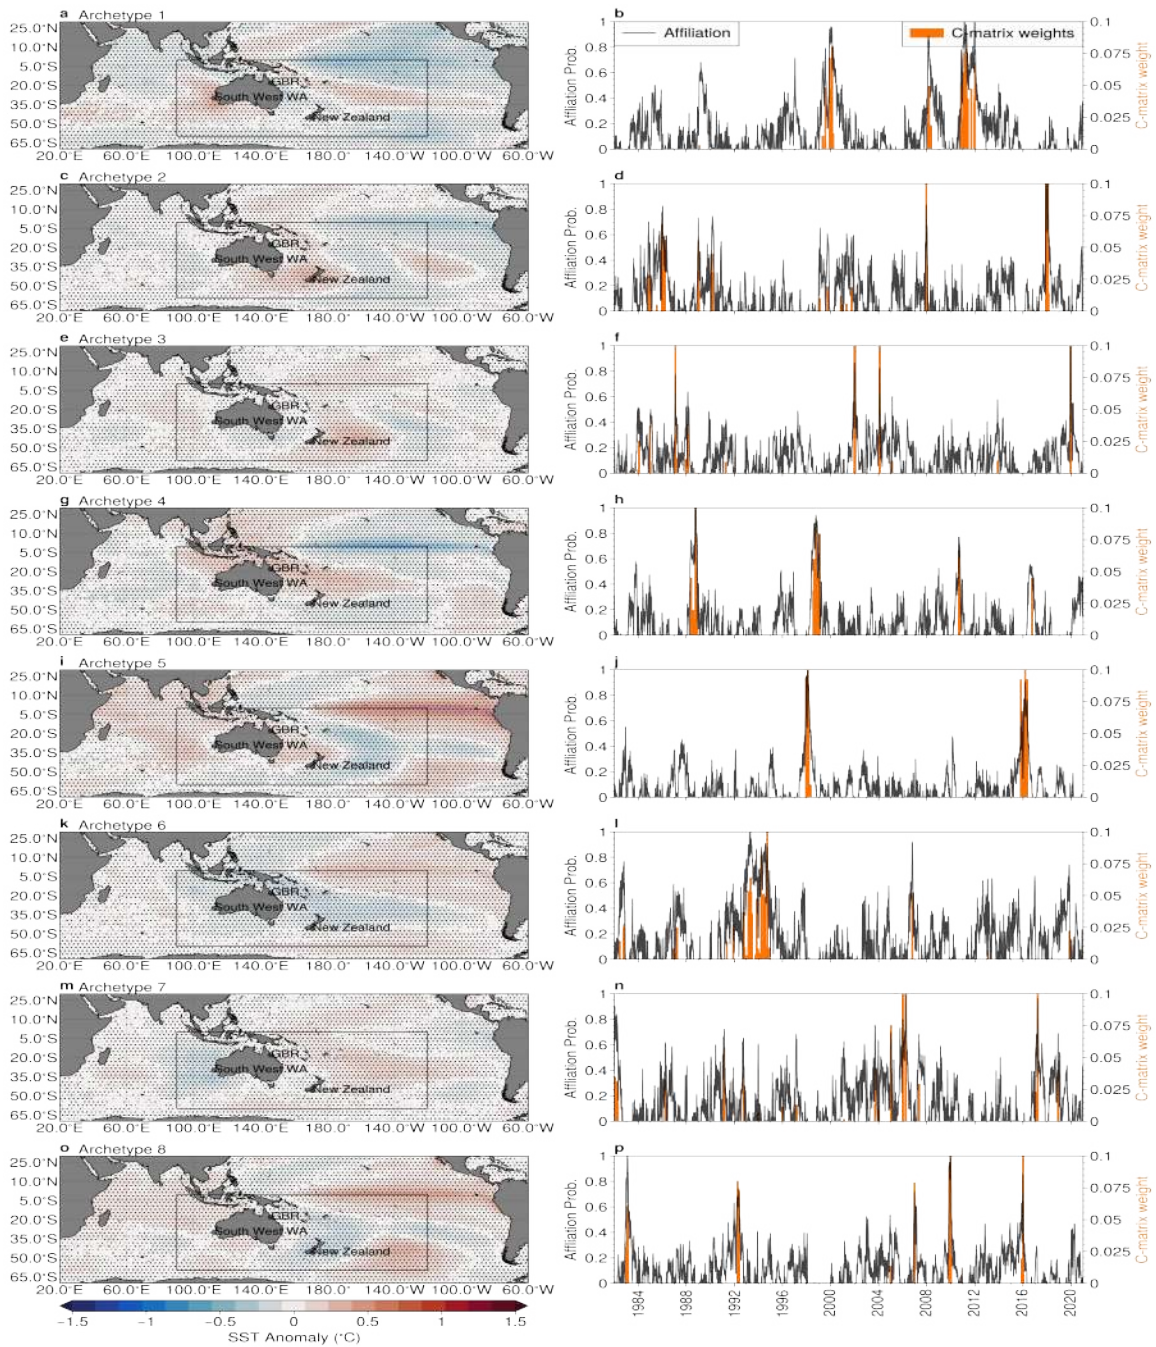

Supplementary Figure 14: **Statistical Significance of Archetypal sea-surface temperature Patterns** : (left) Detrended sea-surface temperature (SST) anomalies for all eight archetypal patterns computed over the Australasian region (indicated by the black box), and (right) associated affiliation time-series (black solid line) and the *C-matrix weights* applied to each time snapshot to form the archetypes (orange bars). Stippling indicates regions where the patterns are statistically significant at the 95% confidence level (right) associated affiliation time-series (black solid line) and the *C-matrix weights* applied to each time snapshot to form the archetypes (orange bars)

216 tential height patterns computed using the  $S$ -matrix weights obtained from the  
217 archetypes computed using SST. Unlike the SST patterns themselves, the geopo-  
218 tential height patterns are not everywhere significant. However, the regions of  
219 statistical significance typically encapsulate the broad-scale teleconnections and  
220 larger flow features.

221 To conclude, the spatial patterns produced by the AA undertaken in this  
222 study are robust and, nearly everywhere, statistically significant. We have also  
223 tested the statistical significance of surface atmosphere temperature and sub-  
224 surface oceanic temperatures. However, these are not shown for brevity. The  
225 conclusions however, are the same, all major features of the identified archetypal  
226 or composite fields are significant at the 95% confidence level. However, it is  
227 worth mentioning that there is, to the best of our knowledge, no consensus on  
228 the best statistical significance test for archetype analysis. In general, rather  
229 than sampling points randomly from the distribution, one should sample points  
230 close to the convex hull of the dataset, and test those points against the “corner”  
231 points determined by AA. However, specification of the convex hull of a high  
232 dimensional dataset is difficult, both conceptually and computationally. As  
233 such, in this study we have opted to use a conceptually simple approach to  
234 significance testing, noting that it may not be optimal for AA.

## 235 Supplementary References

- 236 [1] Alan F. Pearce and Ming Feng. The rise and fall of the “marine heat wave”  
237 off western australia during the summer of 2010/2011. *Journal of Marine*  
238 *Systems*, 111-112:139–156, 2013.
- 239 [2] Ming Feng, Nick Caputi, Arani Chandrapavan, Miaoju Chen, Anthony Hart,  
240 and Mervi Kangas. Multi-year marine cold-spells off the west coast of aus-  
241 tralia and effects on fisheries. *Journal of Marine Systems*, 214:103473, 2021.
- 242 [3] Alistair J. Hobday, Eric C.J. Oliver, Alex Sen Gupta, Jessica A. Benthuisen,  
243 Michael T. Burrows, Markus G. Donat, Neil J. Holbrook, Pippa J. Moore,  
244 Mads S. Thomsen, Thomas Wernberg, and Dan A. Smale. Categorizing and  
245 naming marine heatwaves. *Oceanography*, 31, June 2018.
- 246 [4] Eric Oliver, Jessica Benthuisen, Nathaniel Bindoff, Alistair Hobday, Neil  
247 Holbrook, Craig Mundy, and Sarah Perkins-Kirkpatrick. The unprecedented  
248 2015/16 tasman sea marine heatwave. *Nature Communications*, 8:16101, 07  
249 2017.
- 250 [5] A. Schaeffer and M. Roughan. Subsurface intensification of marine heat-  
251 waves off southeastern australia: The role of stratification and local winds.  
252 *Geophysical Research Letters*, 44(10):5025–5033, 2017.
- 253 [6] Alistair Hobday and Gretta Pecl. Identification of global marine hotspots:  
254 Sentinels for change and vanguards for adaptation action. *Reviews in Fish*  
255 *Biology and Fisheries*, 24, 06 2014.



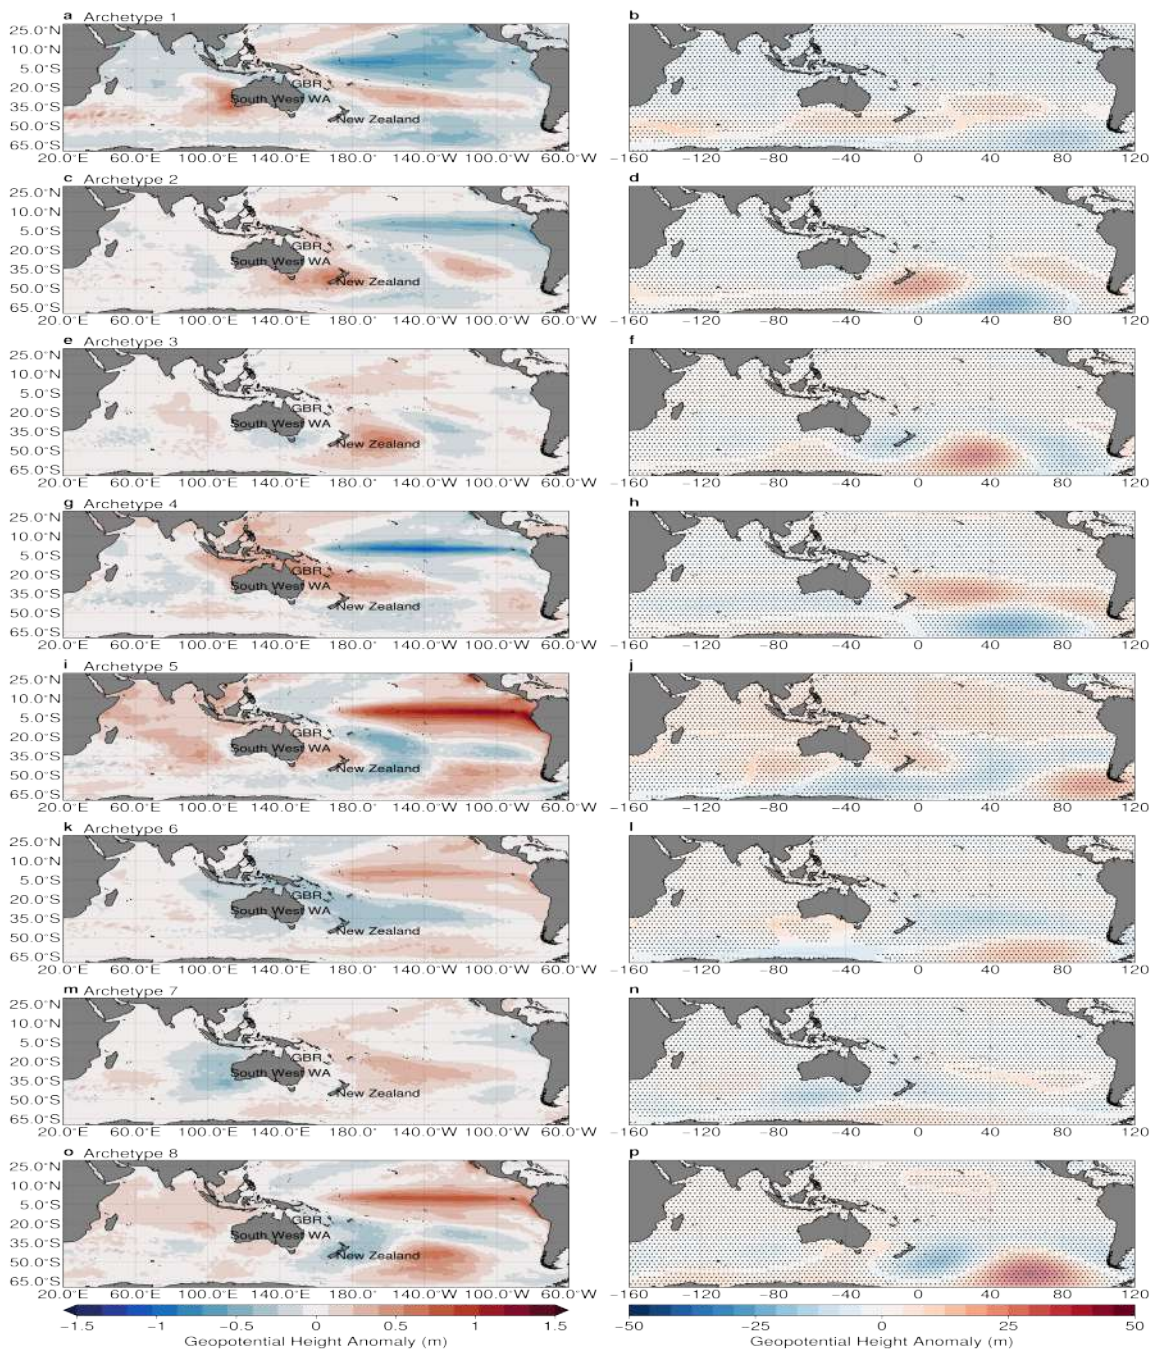

Supplementary Figure 15: **Statistical Significance of Archetypal 500hPa Geopotential Patterns** : (left) Detrended sea-surface temperature (SST) anomalies for all eight archetypal patterns computed over the Australasian region (indicated by the black box), and (right) associated mid-tropospheric 500hPa geopotential height anomalies. Stippling indicates regions where the patterns are statistically significant at the 95% confidence level
